# Supplementary material for: Morphophysiological and phytochemical properties of peppermint ecotypes: a comprehensive study in 11 provinces of Iran
Source: Research Square preprint supplement (doi:10.21203/rs.3.rs-4972754/v1), 2024-09-26
Supplement: Supplementary file 1 [file a7a43bb6dc97f3a9bf4536ff.docx]

**Table1** The information and geographical location of the collecting place of ecotypes

|  | province | city | Longitude and latitude | altitude |
| --- | --- | --- | --- | --- |
| 1 | Qom | Qom | [34°38′24″N, 50°52′35″E](https://geohack.toolforge.org/geohack.php?pagename=Qom&params=34_38_24_N_50_52_35_E_region:IR_type:city) | 936m |
| 2 | Hamedan | Hamedan | [48°31′00″N, 34°48′00″E](https://geohack.toolforge.org/geohack.php?pagename=Qom&params=34_38_24_N_50_52_35_E_region:IR_type:city) | 1850m |
| 3 | East Azerbaijan | Khosrowshahr | 37o75'89''N, 45o97'66''E | 1340m |
| 4 | Golestan | Gorgan | [54°26′00″N, 36°50′30″E](https://geohack.toolforge.org/geohack.php?pagename=Qom&params=34_38_24_N_50_52_35_E_region:IR_type:city) | 160m |
| 5 | Mazandaran | Sari | [53°03′30″N, 36°34′00″E](https://geohack.toolforge.org/geohack.php?pagename=Qom&params=34_38_24_N_50_52_35_E_region:IR_type:city) | 185m |
| 6 | Kermanshah | Kermanshah | 34o32'77''N, 47o07'78'' | 1350m |
| 7 | Markazi | Arak | [49°41′30″N, 34°05′30″E](https://geohack.toolforge.org/geohack.php?pagename=Qom&params=34_38_24_N_50_52_35_E_region:IR_type:city) | 1755m |
| 8 | Gilan | Rasht | [37°16′51″N, 49°34′59″E](https://geohack.toolforge.org/geohack.php?pagename=Rasht&params=37_16_51_N_49_34_59_E_region:IR_type:city) | 20m |
| 9 | Alborz | Karaj | 35o46'21''N, 50o46'07''E | 1320m |
| 10 | Kerman | Kerman | 30o17'30''N, 57o05'00''E | 1755m |
| 11 | Zanjan | Zanjan | 36o51'10''N, 48o78'57''E | 1767m |

**Table 2** Soil information of the test station

| Soil texture | Saturated soil reaction | The electrical conductivity | Sand (%) | Silt  (%) | Clay (%) | TNV- total neutralized value (%) | Organic carbon  (g/100g) | Organic matter (g/100g) | Total nitrogen (g/100g) | Absorbable potassium  (g/100g) | Absorbable phosphorus  (g/100g) |
| --- | --- | --- | --- | --- | --- | --- | --- | --- | --- | --- | --- |
| Sand-Clay | 7.5 | 0.7 | 45 | 29 | 26 | 11.2 | 0.88 | 1.54 | 0.08 | 176 | 9.3 |
|  |  |  |  |  |  |  |  |  | *18.18(kg/ha) | *40 (kg/ha) | *21.13 (kg/ha) |

*****The amount of nitrogen, phosphorus and potassium in the root development depth (40 cm) per hectare was calculated based on the ƿ=m/v. (ƿ=Baulk Density (1.76 g/cm3), m= Mass, v=Volume)

**Table 3** Climatic information of the test station

| Relative Humidity (%). Mean. | Relative Humidity (%). Min. | Relative Humidity (%). Max. | Tem. Mean (OC) | Tem. Min (OC) | Air Tem. Max (OC) | Year |
| --- | --- | --- | --- | --- | --- | --- |
| 32.8 | 14.8 | 57.7 | 25.3 | 17 | 33 | 2021 |
| 34.3 | 15.9 | 60.6 | 24 | 16.3 | 31.8 | 2022 |
| 33.55 | 15.35 | 59.15 | 24.65 | 16.65 | 32.4 | Mean |

**Table 4** Results of composite variance analysis of morphological traits, yield of different organs and essential oils of different peppermint ecotypes

| S.O.V | df | Plant height | Inflorescence length | Branch number | leaf length | leaf width | inflorescence diameter | Stem diameter | Inflorescence number | Stem yield | Leaf yield | Inflorescence yield | Shoot yield | Leaf essential oil percentage | shoot essential oil percentage | shoot essential oil yield |
| --- | --- | --- | --- | --- | --- | --- | --- | --- | --- | --- | --- | --- | --- | --- | --- | --- |
| Year (Y) | 1 | 5.46ns | 6.87* | 23.04** | 0.04ns | 0.15* | 0.003ns | 0.13** | 56.37** | 111438* | 80500.3ns | 37442* | 657801* | 0.96** | 0.25** | 1910** |
| Error Y | 4 | 3.15 | 0.73 | 16.31 | 0.02 | 0.02 | 0.02 | 0..002 | 3.96 | 69624.4 | 13892.3 | 9544.8 | 127031 | 0.47 | 0.08 | 166 |
| Ecotype (E) | 10 | 867.2** | 11.7** | 89.27** | 2.6** | 0.6** | 0.09** | 0.7** | 30.64** | 897139** | 952748.8** | 346272** | 2761174** | 0.71** | 0.15** | 20.23** |
| Y*E | 10 | 9.53ns | 0.26ns | 0.41ns | 0.25ns | 0.01ns | 0.01ns | 0.13** | 0.77ns | 1990.1ns | 167.47** | 6203.4ns | 6802.4ns | 0.09ns | 0.008ns | 25.21ns |
| Error | 40 | 9.001 | 1.04 | 2.61 | 0.19 | 0.03 | 0.01 | 0.004 | 2.75 | 22310.1 | 39706.9 | 6170.8 | 92798.2 | 0.08 | 0.03 | 163.85 |
| Cv% | -- | 5.61 | 18.59 | 12.06 | 11.02 | 9..88 | 11.28 | 16.98 | 17.92 | 5.96 | 8.008 | 13.91 | 5.48 | 12.59 | 9.86 | 12.62 |

ns, * and ** indicate non-significance and significant difference at 5 and 1 percent level, respectively

**Table 5** Results of composite variance analysis of physiological traits of different ecotypes of peppermint

| S.O.V | df | phenol | flavonoid | chla | chlb | chT | carotenoids |
| --- | --- | --- | --- | --- | --- | --- | --- |
| Year (Y) | 1 | 17.51ns | 58.24* | 1.1** | 1.45* | 4.48ns | 0.24ns |
| Error Y | 4 | 5.009ns | 10.65ns | 6.1ns | 9.99ns | 6.74ns | 2.93* |
| Ecotype (E) | 10 | 30.41** | 27.48** | 4.81** | 5.93** | 5.81** | 4.37** |
| Y*E | 10 | 0.58ns | 2.94ns | 1.12ns | 3.64ns | 1.7ns | 0.3ns |
| Error | 40 | 6.76 | 9.18 | 1.25 | 2.05 | 1.64 | 1.03 |
| Cv% | -- | 11.4 | 20.1 | 27.84 | 29.78 | 23.15 | 28.78 |

ns, * and ** indicate non-significance and significant difference at 5 and 1 percent level, respectively

**Table 6** Results of composite variance analysis of essential oil compounds of different peppermint ecotypes

| S.O.V | Df | α-pinene  MH | sabinene  MH | β-pinene | myrcene | 3-octanal | limonene | 1,8-cineole | cis-sabinene hydrate | menthone | iso-menthone | menthofurane | δ-terpineol | menthol | iso-menthol | α -terpineol | pulegone | neo-menthyl acetate | menthyl acetate |
| --- | --- | --- | --- | --- | --- | --- | --- | --- | --- | --- | --- | --- | --- | --- | --- | --- | --- | --- | --- |
|  | Grouping | MH | MH | MH | MH | Alcohol | MH | OM | OM | OM | OM | OM | OM | OM | OM | OM | OM | OM | OM |
|  | KI | 940 | 975 | 982 | 995 | 997 | 1032 | 1034 | 1070 | 1155 | 1160 | 1163 | 1167 | 1172 | 1184 | 1190 | 1235 | 1275 | 1295 |
| Year (Y) | 1 | 0.02ns | 0.03ns | 0.3ns | 0.1ns | 0.09ns | 0.63ns | 1.02ns | 0.1ns | 11.29ns | 14.3ns | 8.03* | 0.01ns | 0.01ns | 0.07ns | 0.16* | 0.3ns | 0.1* | 16.71** |
| Error year | 4 | 0.04ns | 0.02ns | 1.05** | 0.02ns | 0.014 | 1.32 | 0.62 | 0.19 | 8.8 | 8.11 | 1.5 | 1.26 | 17.2 | 0.13 | 0.03 | 0.39 | 0.009 | 0.95 |
| Ecotype (E) | 10 | 0.15** | 0.16** | 0.36** | 0.07* | 0.019ns | 13.45** | 11.74** | 1.23** | 227.2** | 150.49** | 10.15** | 11.21** | 459** | 0.36** | 0.08** | 3.36** | 0.19** | 92.8** |
| Y*E | 10 | 0.05ns | 0.03ns | 0.22* | 0.02ns | 0.012 | 1.41ns | 1.75ns | 0.08ns | 2.41ns | 1.33ns | 0.82ns | 1.05ns | 5.12ns | 0.07ns | 0.007ns | 0.4ns | 0.018ns | 1.52ns |
| Error | 40 | 0.03 | 0.03 | 0.09 | 0.03 | 0.019 | 1.12 | 1.89 | 0.08 | 3.10 | 1.87 | 1.16 | 0.62 | 6.89 | 0.05 | 0.02 | 0.38 | 0.03 | 1 |
| Cv% | -- | 20.21 | 21.13 | 22.54 | 47.21 | 30.2 | 26 | 15.94 | 28.22 | 14.11 | 16.3 | 29 | 24.3 | 6.22 | 28.56 | 29.66 | 22.25 | 28.47 | 10.8 |

ns, * and ** indicate non-significance and significant difference at 5 and 1 percent level, respectively

MH: Monoterpene hydrocarbons

OM: Oxygenated monoterpenes

**Table 7** Results of composite variance analysis of elements absorbed by different ecotypes of peppermint

| S.O.V | Df | N | P | K | Ca | Mg | Fe | Mn | Zn | Cu | Cd | Pb | Cr | Ni |
| --- | --- | --- | --- | --- | --- | --- | --- | --- | --- | --- | --- | --- | --- | --- |
| Year (Y) | 1 | 31.36** | 0.81ns | 19.8* | 137.3** | 5.69* | 1382.003** | 272.33** | 0.78* | 0.09ns | 0.24** | 0.09* | 0.03ns | 0.02ns |
| Error year | 4 | 5.13ns | 0.55ns | 6.68* | 19.49ns | 0.82ns | 35.79ns | 92.48* | 0.01ns | 0.13 | 0.09* | 0.02ns | 0.002ns | 0.004ns |
| Ecotype (E) | 10 | 38.94** | 1.93** | 14.98** | 295.6** | 16.59** | 119.51ns | 122.1** | 2.77** | 0.64** | 0.03ns | 0.01ns | 0.04** | 0.04** |
| Y*E | 10 | 3.63ns | 0.39ns | 0.66ns | 7.15ns | 0.12ns | 34.47ns | 3.04ns | 0.05ns | 0.01ns | 0.001ns | 0.002ns | 0.002ns | 0.001ns |
| Error | 40 | 3.15 | 0.61 | 2.76 | 12.96 | 0.79 | 97.2 | 26.8 | 0.13 | 0.13 | 0.02 | 0.01 | 0.01 | 0.009 |
| Cv% | -- | 15.17 | 28.08 | 16.97 | 20.36 | 30.08 | 24.01 | 25.7 | 27.21 | 27.26 | 47.28 | 42.31 | 60.03 | 61.93 |

ns, * and ** indicate non-significance and significant difference at 5 and 1 percent level, respectively

**Table 8** The results of two-year average comparison of morphological traits, aerial organs yield and essential oil of different accessions of peppermint

| year | Inflorescence length | Branch number | leaf width | Inflorescence number | Stem yield | Inflorescence yield | Shoot yield | Leaf essential oil percentage | shoot essential oil percentage | shoot essential oil yield | flavonoid | chla | chlb |
| --- | --- | --- | --- | --- | --- | --- | --- | --- | --- | --- | --- | --- | --- |
|  | (cm) | (n/p) | (cm) | (n/p) | (kg/ha) | (kg/ha) | (kg/ha) | (%) | (%) | (kg/ha) | (mg/g .dw) | (µg.ml gfw) | (µg.ml gfw) |
| first | 5.81a | 12.81b | 1.84a | 8.33b | 2463.03b | 540.8b | 5457.2b | 2.24b | 1.75b | 95.97b | 16.01a | 0.0004a | 0.00013b |
| second | 5.17b | 14a | 1.74b | 10.18a | 2545.2a | 588.4a | 5656.88a | 2.48a | 1.87a | 106.7a | 14.13b | 0.0003b | 0.00016a |

The same letters in each column indicate the absence of significant differences between the means.

**Table 9** The results of two-year mean comparison of some essential oil compounds and elements of different ecotypes of peppermint

| year | menthofurane | α -terpineol | neo-menthyl acetate | menthyl acetate | N | K | Ca | Mg | Fe | Mn | Zn | Cd | Pb | Ni |
| --- | --- | --- | --- | --- | --- | --- | --- | --- | --- | --- | --- | --- | --- | --- |
|  | (%) | (%) | (%) | (%) | (g/kg) | (g/kg) | (g/kg) | (g/kg) | (mg/g) | (mg/g) | (mg/g) | (mg/g) | (mg/g) | (mg/g) |
| first | 3.1b | 0.35b | 0.5b | 8.76b | 12.4a | 10.33a | 19.12a | 3.25a | 45.63a | 22.16a | 1.44a | 0.19a | 0.13a | 0.04a |
| second | 3.81a | 0.46a | 0.6a | 9.77a | 11.02b | 9.24b | 16.23b | 2.67b | 36.48b | 18.1b | 1.23b | 0.1b | 0.08b | 0.02a |

The same letters in each column indicate the absence of significant differences between the means.

**Table 10** The results of mean comparisons of morphological and physiological traits of different ecotypes of peppermint

| Ecotype | plant height | Inflorescence length | branches number | leaf length | leaf width | inflorescence diameter | inflorescences number | Stem yield | Inflorescence yield | Shoot yield | Leaf essential oil | Shoot essential oil | Shoot essential oil yield | phenol | flavonoid | chla | chlb | chT | cart |
| --- | --- | --- | --- | --- | --- | --- | --- | --- | --- | --- | --- | --- | --- | --- | --- | --- | --- | --- | --- |
|  | (cm) | (cm) | (n/p) | (cm) | (cm) | (cm) | (n/p) | (kg/ha) | (kg/ha) | (kg/ha) | (%) | (%) | (kg/ha) | (mg/g .dw) | (mg/g .dw) | (µg.ml gfw) | (µg.ml gfw) | (µg.ml gfw) | (µg.ml gfw) |
| Qom | 55.16d | 4.33d | 13bc | 3.31fg | 2.13ab | 0.98bc | 9b | 23e | 418.1d | 4838.2f | 2.26cd | 1.68cd | 81.52e | 23.46bc | 13.35bc | 0.00036bc | 0.00018ab | 0.00054bc | 5.41a |
| Hamedan | 63.5c | 5.16bcd | 10.16de | 4.25bcd | 1.86c | 1.16a | 8.33b | 253cd | 310.1e | 6200.2b | 2.56bc | 1.63d | 101.8bcd | 22.17bcd | 15.28ab | 0.00035bc | 0.00016abc | 0.00052bc | 3.61b |
| East Azarbaijan | 63.16c | 5.83bc | 11.83cd | 4.41bc | 2.2a | 0.78d | 7.33b | 3046.8a | 424.6d | 5804.8cd | 2.95a | 1.91bc | 111.3b | 24.44ab | 17.13ab | 0.00032bc | 0.00014bc | 0.00047c | 3.45b |
| Golestan | 38.33h | 4.75cd | 20.83a | 2.86g | 1.61d | 1.01bc | 13.66a | 2549cd | 980a | 5965.3bcd | 2.01d | 1.93b | 115.6b | 24.08b | 13.23bc | 0.00046b | 0.00011c | 0.00058bc | 2.92bc |
| Mazandaran | 52.16de | 5.43bd | 12.33c | 3.83def | 1.95bc | 1bc | 7.5b | 2592bc | 252.5e | 5360.5e | 2.08d | 1.75bcd | 9.56cde | 21.62bcd | 14.08abc | 0.00042bc | 0.00016abc | 0.00059bc | 3.7b |
| Kermanshah | 48.33f | 4.16d | 9e | 3.85def | 1.55d | 1.06abc | 7.16b | 2376.6de | 414.6d | 5217.2e | 2.21cd | 1.75bcd | 90.32de | 21.62bcd | 17.77a | 0.00036bc | 0.00012bc | 0.00049bc | 3.11b |
| Markazi | 71.33a | 6.16b | 14.83b | 5.31a | 2.1ab | 1.2a | 7.83b | 2736.6b | 776.1b | 6559.2a | 2.63ab | 2.2a | 144.4a | 22.72bcd | 14.24abc | 0.00042bc | 0.00021a | 0.0006ab | 3.88b |
| Gilan | 50.8ef | 6.33b | 12.16cd | 3.6ef | 1.46de | 1.06abc | 8.5b | 3116.6a | 623c | 6177.3bc | 2.16d | 1.73bcd | 107.1bc | 24.14b | 16.65ab | 0.00034bc | 0.00011c | 0.00046c | 3.28b |
| Alborz | 67.66b | 4.75cd | 10.16de | 4.58b | 1.51d | 1.13ab | 8.33b | 1973.33f | 418.1d | 4448.3g | 2.91ab | 1.89bc | 83.9e | 20.05cd | 11.02c | 0.00063a | 0.00015bc | 0.00078a | 4.005b |
| Kerman | 34.66i | 4.43d | 13bc | 3.73def | 1.28e | 0.91cd | 11.83a | 1856f | 823b | 4770.5fg | 2.16d | 1.75bcd | 83.9e | 27.42a | 17.77a | 0.0003c | 0.00014bc | 0.00045c | 3.6b |
| Zanjan | 43g | 9.08a | 20.16a | 4cde | 2.05abc | 0.91cd | 12.33a | 2468.1cde | 770.8b | 5786d | 2.01d | 1.75bcd | 101.2bcd | 21.12bcd | 15.28ab | 0.0004bc | 0.00012bc | 0.00053bc | 1.86c |

The same letters in each column indicate the absence of significant differences between the means

**Table 11** The results of mean comparison of essential oil composition of different ecotype of peppermint in two years (all units are in percentage)

| Ecotype | α-pinene | sabinene | myrcene | limonene | 1,8-cineole | cis-sabinene hydrate | menthone | iso-menthone | menthofurane | γ-terpineol | menthol | iso-menthol | α -terpineol | pulegone | neo-menthyl acetate | menthyl acetate |
| --- | --- | --- | --- | --- | --- | --- | --- | --- | --- | --- | --- | --- | --- | --- | --- | --- |
| Qom | 0.88bcd | 0.84bc | 0.32b | 2.96cd | 8.31cd | 0.76c | 8.19ef | 17.59a | 5.5a | 1d | 38.54d | 1.17a | 0.32bc | 3.3bc | 0.65abc | 9.91cd |
| Hamedan | 0.79cd | 0.8bcd | 0.68a | 3.95c | 10.19a | 0.74c | 5.81g | 3.38e | 1.97e | 4.16abc | 54.34b | 1.06ab | 0.41bc | 3.25bc | 0.46bcd | 12.39a |
| East Azarbaijan | 0.99bc | 0.83bc | 0.42b | 3.7c | 8.88abc | 0.48cd | 9.73de | 4e | 2.9cde | 3.88abc | 42.59c | 0.9abc | 0.35bc | 3.76ab | 0.53bcd | 11.57a |
| Golestan | 0.97bcd | 0.58d | 0.33b | 3.4c | 10.41a | 1.45ab | 13.61c | 3.23e | 4.63ab | 1.46d | 40.22cd | 0.85def | 0.27c | 4.09a | 0.76a | 12.84a |
| Mazandaran | 0.73d | 0.6d | 0.45ab | 3.79c | 7.99cde | 0.26d | 23.7a | 4e | 4.24abc | 4.39ab | 33.89f | 0.65c-f | 0.62a | 2.43def | 0.29d | 4.6e |
| Kermanshah | 0.96bcd | 0.8bcd | 0.33b | 4.13c | 8.33bcd | 1.35b | 9.78de | 6d | 4.25abc | 4.15abc | 59a | 0.63c-f | 0.6a | 2.27drf | 0.33d | 3.75e |
| Markazi | 0.78cd | 0.94ab | 0.3b | 5.74b | 10.06ab | 1.77a | 20.71b | 4.47de | 4.68ab | 3.45bc | 39.93cd | 0.7cde | 0.4bc | 2.55cde | 0.43cd | 2.15f |
| Gilan | 1.13ab | 0.93ab | 0.42b | 1.77d | 6.3e | 1.15b | 9.07de | 10.77c | 2.66de | 3.8abc | 39.68cd | 0.35f | 0.5ab | 2.15ef | 0.49bcd | 10.83bc |
| Alborz | 1.09ab | 0.69cd | 0.37b | 3.81c | 7.92cde | 1.2b | 10.91d | 11.34c | 1.67e | 4.76a | 37.45de | 0.8bcd | 0.34bc | 1.63f | 0.88a | 12.26a |
| Kerman | 1.27a | 1.13a | 0.51ab | 7.58a | 9.88ab | 0.71c | 6.58fg | 12.99b | 3.55bcd | 1.06d | 34.54ef | 0.73cde | 0.3c | 2.28def | 0.48bcd | 8.94d |
| Zanjan | 0.96bcd | 0.98ab | 0.47ab | 3.92c | 6.73de | 1.26b | 9.14de | 13.56b | 1.95e | 3.3c | 39.7cd | 0.44ef | 0.31bc | 3.03bcd | 0.68ab | 12.72a |

The same letters in each column indicate the absence of significant differences between the means

**Table 12** The results of mean comparision of the elements absorbed by different ecotype of peppermint

| Ecotype | N | P | K | Ca | Mg | Mn | Zn | Cu | Cr | Ni |
| --- | --- | --- | --- | --- | --- | --- | --- | --- | --- | --- |
|  | (g/kg) | (g/kg) | (g/kg) | (g/kg) | (g/kg) | (mg/g) | (mg/g) | (mg/g) | (mg/g) | (mg/g) |
| Qom | 11.79cd | 3.73a | 12.68a | 12.33d | 2.86c | 18.78c | 0.63gh | 1.37bc | 0.13a | 0.04ab |
| Hamedan | 14.66ab | 2.45bcd | 9.72bcd | 33.16a | 7.3a | 19.03c | 0.42h | 1.97a | 0.11ab | 0.07a |
| East Azarbaijan | 10.5de | 2.003cd | 10.99abc | 12.66d | 2.48cde | 19.51c | 0.93fg | 1.32cd | 0.02bc | 0.001b |
| Golestan | 8.36e | 3.003abc | 9.76bcd | 14.46cd | 2.92c | 26.92ab | 1.59cde | 1.41bc | 0.01c | 0.03ab |
| Mazandaran | 9.51de | 2.91abc | 11.11abc | 14.53cd | 2.47cde | 19.41c | 1.25ef | 1.18cd | 0.02c | 0.002b |
| Kermanshah | 16.28a | 3.22ab | 9.06cd | 14.46cd | 2.7cd | 20.33c | 2.15ab | 1.14cd | 0.08abc | 0.07a |
| Markazi | 13.76bc | 3.15ab | 8.93cd | 12.8d | 2.96c | 20.33c | 1.74bcd | 1.15cd | 0.07abc | 0.06a |
| Gilan | 11.66cd | 3.17ab | 7.9d | 23.1b | 4.36b | 17.34c | 0.42h | 1.04cd | 0.05abc | 0.04ab |
| Alborz | 8.73e | 2.61bcd | 7.59d | 12.33d | 1.48e | 11.2d | 1.33def | 0.85d | 0.04abc | 0.03ab |
| Kerman | 10.23de | 2.72abcd | 11.33ab | 18.09b | 1.71de | 20.95bc | 1.85bc | 1.5bc | 0.05abc | 0.02ab |
| Zanjan | 13.3bc | 1.77d | 8.6d | 26.86b | 1.36e | 28.2a | 2.39a | 1.8ab | 0.001c | 0.001b |

The same letters in each column indicate the absence of significant differences between the means

**Table 13** The results of mean comparison of interaction effect of year * ecotype on different traits of peppermin

| Ecotype | Stem Diameter | | Leaf Yield | | β-pinene | |
| --- | --- | --- | --- | --- | --- | --- |
|  | (cm) | | (kg/ha) | | (%) | |
|  | Year1400 | Year1401 | Year1400 | Year1401 | Year1400 | Year1401 |
| Qom | 0.33cdef | 0.3cdef | 2080ef | 216def | 1.26de | 0.93e |
| Hamedan | 0.21f | 0.2f | 3333.3ab | 3386.7a | 1.24de | 0.97de |
| East Azarbaijan | 0.26cdef | 0.24def | 2293.3cdef | 2373.3cdef | 1.47abcde | 1.59abcd |
| Golestan | 0.21f | 0.21f | 2400cdef | 2472.7cd | 1.24de | 1.57abcd |
| Mazandaran | 0.31cdef | 0.33cdef | 248cd | 2552c | 1.28cde | 0.94e |
| Kermanshah | 0.32cdef | 0.35cd | 2400cdef | 2451.7cde | 1.49abcde | 1.93ab |
| Markazi | 0.35cde | 0.38c | 3013.3b | 3079.3ab | 1.42bcde | 1.05de |
| Gilan | .29cdef | 0.27cdef | 2400cdef | 2475.3cd | 1.49abcde | 0.98de |
| Alborz | 0.3cdef | 0.28cdef | 2026.7f | 2087ef | 1.49abcde | 1.89abc |
| Kerman | 1.2a | 0.91b | 2053.3f | 2129.7def | 2.06a | 1.36bcde |
| Zanjan | 0.22ef | 0.22ef | 2506.7cd | 2587.3c | 1.49abcde | 1.23de |

The same letters in each column indicate the absence of significant differences between the means

**Table 14** Correlation of morphological traits, different organs yield, essential oil and physiological traits of different ecotypes of peppermint

|  | Plant height | Inflorescence length | Branch number | leaf length | leaf width | inflorescence diameter | Stem diameter | Inflorescence number | Stem yield | Leaf yield | Inflorescence yield | Shoot yield | Leaf essential oil percentage | shoot essential oil percentage | shoot essential oil yield |
| --- | --- | --- | --- | --- | --- | --- | --- | --- | --- | --- | --- | --- | --- | --- | --- |
|  | 1 | 2 | 3 | 4 | 5 | 6 | 7 | 8 | 9 | 10 | 11 | 12 | 13 | 14 | 15 |
| 1 | 1 |  |  |  |  |  |  |  |  |  |  |  |  |  |  |
| 2 | 0.008ns | 1 |  |  |  |  |  |  |  |  |  |  |  |  |  |
| 3 | -0.41** | 0.36** | 1 |  |  |  |  |  |  |  |  |  |  |  |  |
| 4 | 0.63** | 0.14ns | -0.22* | 1 |  |  |  |  |  |  |  |  |  |  |  |
| 5 | 0.36** | 0.3* | 0.1ns | 0.27* | 1 |  |  |  |  |  |  |  |  |  |  |
| 6 | 0.28* | -0.12ns | -0.11ns | 0.18ns | -0.11ns | 1 |  |  |  |  |  |  |  |  |  |
| 7 | -0.41** | -0.22* | -0.09ns | -0.11ns | -0.43** | -0.13ns | 1 |  |  |  |  |  |  |  |  |
| 8 | -0.52** | 0.11ns | 0.63** | -0.34** | -0.19ns | -0.19ns | 0.16ns | 1 |  |  |  |  |  |  |  |
| 9 | 0.24* | 0.3* | 0.04ns | 0.07ns | 0.33** | -0.06ns | -0.48** | -0.2* | 1 |  |  |  |  |  |  |
| 10 | 0.35** | 0.17ns | 0.01ns | 0.33** | 0.26* | 0.36** | -0.28* | -0.11ns | 0.4** | 1 |  |  |  |  |  |
| 11 | -0.46** | 0.2ns | 0.65** | -0.14ns | -0.22* | -0.08ns | 0.23* | 0.65** | -0.04ns | -0.07ns | 1 |  |  |  |  |
| 12 | 0.18ns | 0.34** | 0.26* | 0.18ns | 0.26* | 0.15ns | -0.35** | 0.04ns | 0.78** | 0.79** | 0.27* | 1 |  |  |  |
| 13 | 0.59** | -0.18ns | -0.32** | 0.38** | 0.09ns | 0.1ns | -0.14ns | -0.25* | 0.07ns | 0.03ns | -0.15ns | 0.008ns | 1 |  |  |
| 14 | 0.29* | 0.02ns | 0.22* | 0.32** | 0.03ns | 0.08ns | -0.03ns | 0.03ns | 0.13ns | 0.14ns | 0.28* | 0.25* | 0.21* | 1 |  |
| 15 | 0.3* | 0.22* | 0.3* | 0.32** | 0.19ns | 0.15ns | -0.22* | 0.04ns | 0.56** | 0.57** | 0.35** | 0.78** | 0.14ns | 0.8** | 1 |
| 16 | -0.13ns | -0.1ns | -0.2ns | 0.01ns | 0.05ns | -0.19ns | 0.45** | -0.19ns | -0.07ns | -0.17ns | -0.08ns | -0.17ns | -0.15ns | -0.15ns | -0.18ns |
| 17 | -0.2* | 0.07ns | -0.11ns | -0.01ns | -0.03ns | -0.16ns | 0.22* | -0.07ns | 0.07ns | -0.03ns | -0.03ns | 0.008ns | -0.14ns | -0.32** | -0.19ns |
| 18 | 0.21* | 0.03ns | -0.03ns | 0.01ns | -0.08ns | 0.2* | -0.09ns | -0.12ns | -0.2ns | -0.1ns | 0.01ns | -0.17ns | 0.17ns | 0.22* | 0.02ns |
| 19 | 0.44** | -0.05ns | -0.09ns | 0.23* | 0.22* | 0.09ns | -0.04ns | -0.1ns | -0.03ns | 0.18ns | -0.13ns | 0.04ns | 0.32** | 0.35** | 0.27* |
| 20 | 0.34** | 0.01ns | -0.06ns | 0.09ns | -0.001ns | 0.22* | -0.1ns | -0.15ns | -0.19ns | -0.03ns | -0.02ns | -0.14ns | 0.26* | 0.32** | 0.12ns |
| 21 | 0.27* | -0.36** | -0.36** | -0.77ns | 0.13ns | 0.03ns | 0.04ns | -0.16ns | -0.15ns | -0.2ns | -0.27* | -0.3* | 0.23* | -0.07ns | -0.21* |

ns, * and ** indicate non-significance and significant difference at 5 and 1 percent level, respectively

**Continued table 14**

|  | phenol | flavonoid | chla | chlb | chT | carotenoids |
| --- | --- | --- | --- | --- | --- | --- |
|  | 16 | 17 | 18 | 19 | 20 | 21 |
| 16 | 1 |  |  |  |  |  |
| 17 | 0.46** | 1 |  |  |  |  |
| 18 | -0.29* | -0.5** | 1 |  |  |  |
| 19 | -0.0008ns | -0.23* | 0.04ns | 1 |  |  |
| 20 | -0.27* | -0.55** | 0.93** | 0.39** | 1 |  |
| 21 | 0.25* | -0.07ns | -0.009ns | 0.58** | 0.19ns | 1 |

ns, * and ** indicate non-significance and significant difference at 5 and 1 percent level, respectively

**Table 15** Correlation of essential oil compounds of different peppermint ecotypes

| traits | α-pinene | sabinene | β-pinene | myrcene | 3-octanal | limonene | 1,8-cineole | cis-sabinene hydrate | menthone | iso-menthone | menthofurane | γ-terpineol | menthol | iso-menthol | α -terpineol | pulegone | neo-menthyl acetate | menthyl acetate |
| --- | --- | --- | --- | --- | --- | --- | --- | --- | --- | --- | --- | --- | --- | --- | --- | --- | --- | --- |
|  | 1 | 2 | 3 | 4 | 5 | 6 | 7 | 8 | 9 | 10 | 11 | 12 | 13 | 14 | 15 | 16 | 17 | 18 |
| 1 | 1 |  |  |  |  |  |  |  |  |  |  |  |  |  |  |  |  |  |
| 2 | 0.17ns | 1 |  |  |  |  |  |  |  |  |  |  |  |  |  |  |  |  |
| 3 | 0.28* | 0.01ns | 1 |  |  |  |  |  |  |  |  |  |  |  |  |  |  |  |
| 4 | -0.07ns | 0.19ns | -0.19ns | 1 |  |  |  |  |  |  |  |  |  |  |  |  |  |  |
| 5 | -0.12ns | 0.1ns | -0.06ns | -0.08ns | 1 |  |  |  |  |  |  |  |  |  |  |  |  |  |
| 6 | 0.17ns | 0.33** | 0.19ns | 0.21* | -0.08ns | 1 |  |  |  |  |  |  |  |  |  |  |  |  |
| 7 | -0.04ns | 0.01ns | 0.04ns | 0.17ns | 0.16ns | 0.44** | 1 |  |  |  |  |  |  |  |  |  |  |  |
| 8 | 0.03ns | 0.13ns | 0.21* | -0.23* | -0.09ns | 0.06ns | 0.11ns | 1 |  |  |  |  |  |  |  |  |  |  |
| 9 | -0.33** | -0.22* | -0.07n | -0.19ns | -0.03ns | 0.06ns | 0.006ns | 0.19ns | 1 |  |  |  |  |  |  |  |  |  |
| 10 | 0.28* | 0.34** | 0.02ns | -0.05ns | 0.007ns | 0.04ns | -0.3* | -0.01ns | -0.44** | 1 |  |  |  |  |  |  |  |  |
| 11 | -0.12ns | 0.003ns | -0.09n | -0.29* | 0.31* | 0.07ns | 0.25* | 0.01ns | 0.36** | 0.03ns | 1 |  |  |  |  |  |  |  |
| 12 | -0.17ns | -0.28* | -0.01ns | 0.04ns | -0.05ns | -0.12ns | -0.2* | -0.004ns | 0.29* | -0.32** | -0.42** | 1 |  |  |  |  |  |  |
| 13 | -0.14ns | -0.06ns | 0.1ns | 0.01ns | 0.03ns | -0.11ns | 0.08ns | 0.18ns | 0.06ns | -0.32** | -0.03ns | 0.27* | 1 |  |  |  |  |  |
| 14 | -0.08ns | -0.01ns | 0.005ns | 0.12ns | 0.19ns | 0.003ns | 0.41** | -0.17ns | -0.2ns | 0.07ns | 0.08ns | -0.09ns | 0.03ns | 1 |  |  |  |  |
| 15 | -0.15ns | -0.1ns | -0.17ns | -0.004ns | 0.08ns | -0.09ns | -0.19ns | -0.07ns | 0.49** | -0.12ns | 0.11ns | 0.32** | 0.22* | -0.15ns | 1 |  |  |  |
| 16 | -0.07ns | -0.12ns | -0.11ns | 0.11ns | 0.14ns | -0.2ns | 0.23* | -0.06n | -0.13* | -0.2ns | 0.19ns | -0.35** | 0.05ns | 0.13ns | -0.16ns | 1 |  |  |
| 17 | 0.15ns | -0.01ns | 0.18ns | -0.02ns | -0.04ns | -0.11ns | -0.11ns | 0.18ns | -0.31* | 0.28* | -0.03ns | -0.17ns | -0.22* | -0.009ns | -0.33** | 0.12ns | 1 |  |
| 18 | 0.27* | -0.02ns | 0.01ns | 0.21* | 0.07ns | -0.27* | -0.04ns | -0.1ns | -0.73** | 0.26* | -0.37** | -0.13ns | -0.13ns | 0.07ns | -0.35** | 0.31* | 0.56** | 1 |

ns, * and ** indicate non-significance and significant difference at 5 and 1 percent level, respectively

**Table 16** Correlation of macro, micro and heavy metal elements of different peppermint ecotype

|  | N | P | K | Ca | Mg | Fe | Mn | Zn | Cu | Cd | Pb | Cr | Ni |
| --- | --- | --- | --- | --- | --- | --- | --- | --- | --- | --- | --- | --- | --- |
|  | 1 | 2 | 3 | 4 | 5 | 6 | 7 | 8 | 9 | 10 | 11 | 12 | 13 |
| 1 | 1 |  |  |  |  |  |  |  |  |  |  |  |  |
| 2 | 0.21* | 1 |  |  |  |  |  |  |  |  |  |  |  |
| 3 | 0.01ns | 0.17ns | 1 |  |  |  |  |  |  |  |  |  |  |
| 4 | 0.33** | -0.18ns | -0.11ns | 1 |  |  |  |  |  |  |  |  |  |
| 5 | 0.37** | 0.13ns | 0.06ns | 0.49** | 1 |  |  |  |  |  |  |  |  |
| 6 | 0.05ns | -0.08ns | 0.25* | 0.11ns | -0.03ns | 1 |  |  |  |  |  |  |  |
| 7 | 0.07ns | -0.09ns | 0.27* | 0.17ns | 0.003ns | 0.42** | 1 |  |  |  |  |  |  |
| 8 | 0.1ns | -0.015ns | -0.07ns | -0.12ns | -0.51** | 0.31* | 0.41** | 1 |  |  |  |  |  |
| 9 | 0.23* | -0.12ns | 0.2* | 0.45** | 0.34** | 0.17ns | 0.34** | 0.06ns | 1 |  |  |  |  |
| 10 | 0.09ns | -0.01ns | -0.2* | 0.34** | 0.28* | 0.07ns | 0.17ns | -0.12ns | -0.19ns | 1 |  |  |  |
| 11 | 0.07ns | 0.002ns | -0.1ns | 0.22* | 0.27* | 0.09ns | -0.05ns | -0.3* | -0.16ns | 0.56** | 1 |  |  |
| 12 | 0.29* | 0.05ns | 0.12ns | 0.04ns | 0.29* | 0.02ns | -0.11ns | -0.26* | -0.08ns | 0.29* | 0.39** | 1 |  |
| 13 | 0.29* | 0.16ns | -0.16ns | 0.07ns | 0.28* | 0.1ns | -0.02ns | -0.1ns | -0.1ns | 0.38** | 0.44** | 0.49** | 1 |

ns, * and ** indicate non-significance and significant difference at 5 and 1 percent level, respectively

**Table 17** Amount of different essential oil compounds of different peppermint ecotypes, 2021

| Ecotype | linalool | p-cymene | piperitone | iso-menthyl acetate | β-bourbonene | E-caryophllene | E-β-farnesene | Jermacrene D | bicyclogermacrene | spathulenol | caryophyllene oxid |
| --- | --- | --- | --- | --- | --- | --- | --- | --- | --- | --- | --- |
| grouping | OM | MH | OM | OM | SH | SH | SH | SH | SH | OS | OM |
| KI | 1100 | 1020 | 1250 | 1302 | 1390 | 1415 | 1460 | 1485 | 1500 | 1580 | 1587 |
| Qom |  | 0.51 |  | 0.39 |  | 1.29 |  | 0.84 |  |  | 0.32 |
| Hamedan |  | 0.47 |  | 0.47 |  | 0.69 |  |  | 0.58 | 0.63 | 0.38 |
| East Azarbaijan |  | 0.45 |  | 0.42 |  | 0.82 |  |  | 0.42 | 0.45 | 0.31 |
| Golestan |  |  | 0.29 | 0.49 |  |  |  |  | 0.61 | 0.77 |  |
| Mazandaran | 0.37 | 0.26 | 0.5 | 2.29 |  |  | 0.34 | 1.62 |  | 0.25 | 0.52 |
| Kermanshah | 0.34 |  | 0.45 |  |  | 2.05 | 0.33 | 1.33 |  | 0.28 | 0.42 |
| Markazi | 0.46 | 0.22 | 0.53 |  | 0.29 | 2.67 | 0.35 | 1.92 | 0.22 | 0.28 | 0.58 |
| Gilan |  | 8.3 | 0.31 | 0.43 | 0.25 | 1.8 | 0.31 | 1.13 |  | 0.26 | 0.42 |
| Alborz |  |  | 0.32 | 0.48 |  | 0.34 | 0.34 | 1.6 |  |  | 0.46 |
| Kerman |  | 0.3 |  | 0.4 |  | 1.53 |  | 0.95 |  |  |  |
| Zanjan |  |  | 0.29 |  | 0.49 | 1.24 |  | 1.03 |  |  |  |

MH: Monoterpene hydrocarbons

OM: Oxygenated monoterpenes

SH: Sesquiterpene hydrocarbons

OS: Oxygenated sesquiterpenes

**Table 18** The mean of different essential oil composition of different peppermint ecotypes, 2022

| Ecotype | linalool | p-cymene | piperitone | iso-menthyl acetate | β-bourbonene | E-caryophllene | E-β-farnesene | Jermacrene D | bicyclogermacrene | spathulenol | caryophyllene oxid |
| --- | --- | --- | --- | --- | --- | --- | --- | --- | --- | --- | --- |
| Qom | 0.47 |  | 0.34 | 0.27 |  | 2.21 |  | 1.11 | 0.38 |  | 0.57 |
| Hamedan |  | 0.56 |  | 0.52 |  | 0.78 | 0.89 | 1.3 |  |  | 0.42 |
| East Azarbaijan |  | 0.59 |  | 0.32 |  | 1.62 |  |  | 0.56 | 0.82 |  |
| Golestan | 0.36 |  |  | 0.67 | 0.22 | 0.38 | 0.45 |  | 0.75 | 0.56 | 0.33 |
| Mazandaran |  |  | 0.24 | 1.46 |  |  | 0.26 | 0.62 |  |  | 0.82 |
| Kermanshah | 0.42 |  | 0.48 |  |  | 1.25 | 0.48 | 1 | 0.32 |  |  |
| Markazi | 0.21 | 0.32 | 0.44 |  | 0.37 | 3.31 |  | 2.59 |  | 0.91 | 1.21 |
| Gilan |  | 11.6 |  |  |  | 2.4 | 0.41 | 0.71 |  | 0.64 |  |
| Alborz |  |  | 0.62 | 0.29 |  | 1.7 |  | 0.78 |  |  | 0.71 |
| Kerman | 0.33 |  |  | 0.31 |  |  |  | 1.31 | 0.38 |  |  |
| Zanjan | 0.48 |  |  | 0.2 | 0.29 | 0.67 |  | 1.4 |  | 0.37 | 0.38 |

**Dendogram 1**  Cluster analysis of 11 peppermint ecotype collected from different provinces

| | Codes | Ecotypes | | --- | --- | | 1 | Qom | | 2 | Hamedan | | 3 | Ardebil | | 4 | Ghorghan | | 5 | Mazandaran | | 6 | Kermanshah | | 7 | Arak | | 8 | Ghiylan | | 9 | Alborz | | 10 | Kerman | | 11 | Zanjan | | 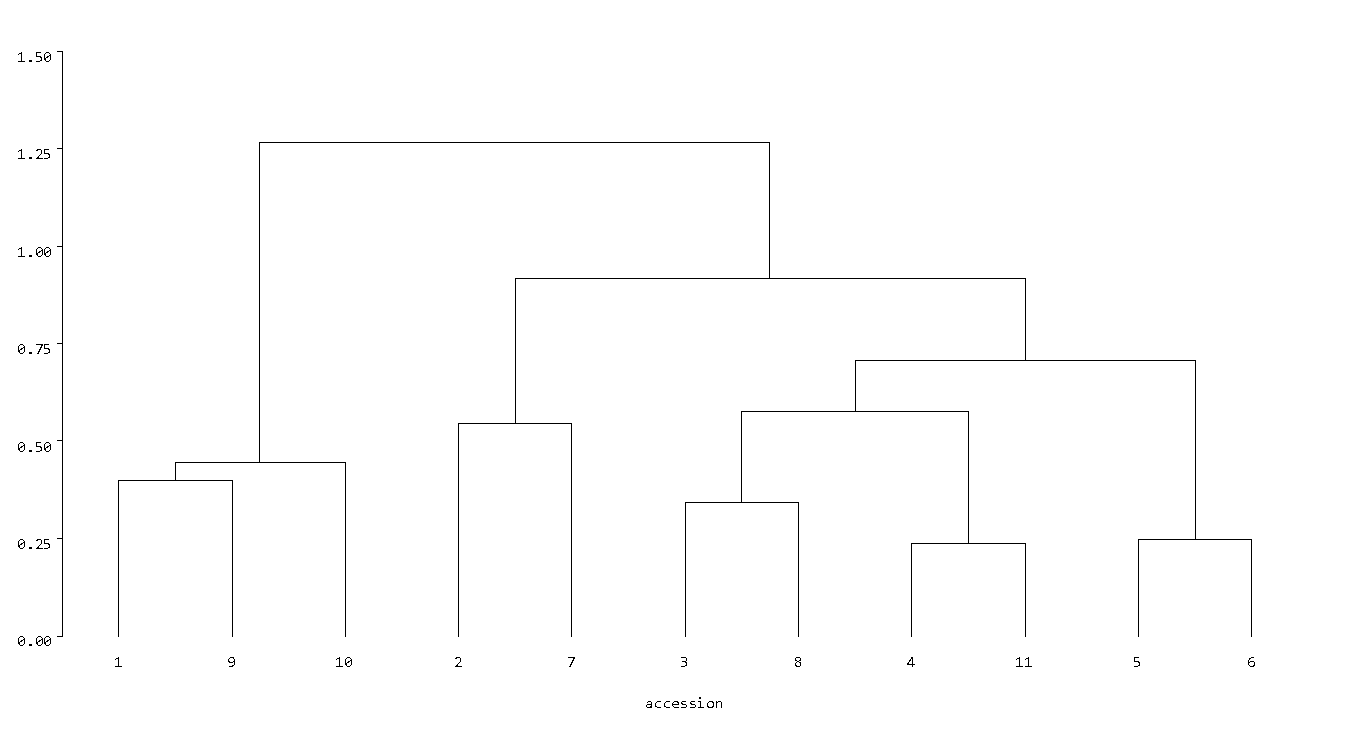 |
| --- | --- | --- | --- | --- | --- | --- | --- | --- | --- | --- | --- | --- | --- | --- | --- | --- | --- | --- | --- | --- | --- | --- | --- | --- | --- |
